# Supplementary material for: Trisomy of a Down Syndrome Critical Region Globally Amplifies Transcription via HMGN1 Overexpression
Source: PubMed Central journal article supplement — Cell Rep. Author manuscript; Available in PMC 2019 Jan 6. (PMC6321629; doi:10.1016/j.celrep.2018.10.061), 2018-11-13
Supplement: NIHMS1514166-supplement-1.pdf [file NIHMS1514166-supplement-1.pdf]

**Cell Reports, Volume 25**

**Supplemental Information**

**Trisomy of a Down Syndrome Critical Region**

**Globally Amplifies Transcription**

**via HMGN1 Overexpression**

**Cody T. Mowery, Jaime M. Reyes, Lucia Cabal-Hierro, Kelly J. Higby, Kristen L. Karlin, Jarey H. Wang, Robert J. Kimmerling, Paloma Cejas, Klothilda Lim, Hubo Li, Takashi Furusawa, Henry W. Long, David Pellman, Bjoern Chapuy, Michael Bustin, Scott R. Manalis, Thomas F. Westbrook, Charles Y. Lin, and Andrew A. Lane**

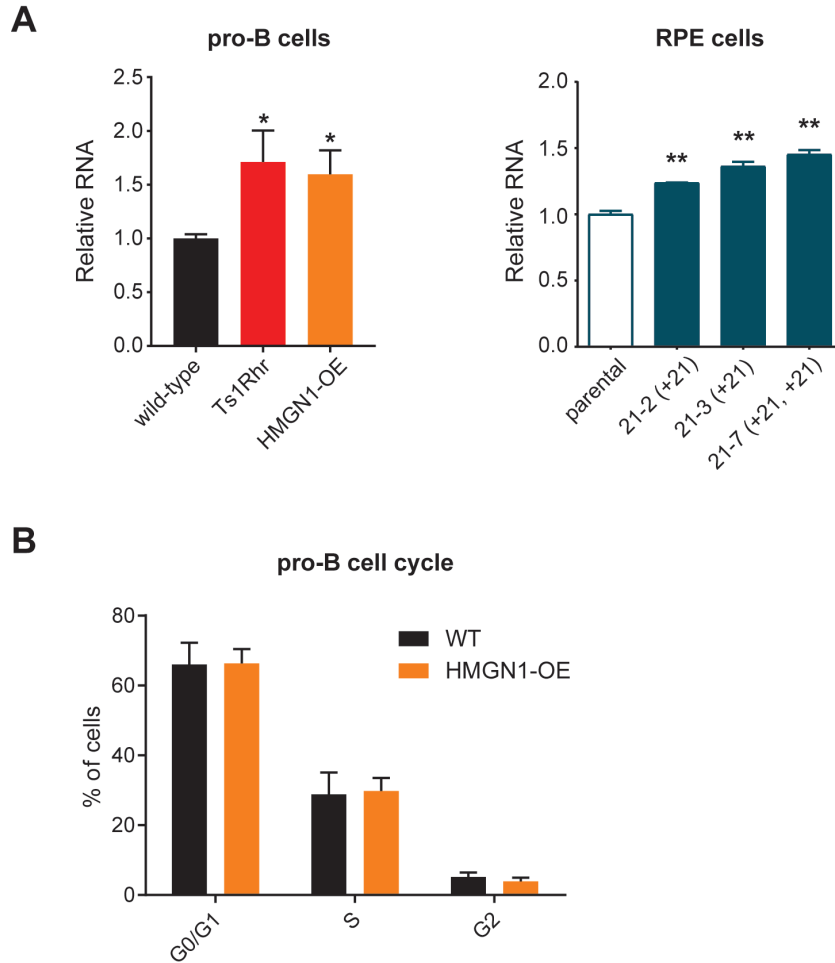

**Figure S1. RNA content in cells modeling aneuploidy of chromosome 21 or HMGN1 overexpression, and cell cycle status of HMGN1 overexpressing progenitor B cells. Related to Figure 1.**

(A) Relative RNA content per cell in primary mouse B cell progenitor colonies of the indicated genotypes (left) or parental retinal pigment epithelium (RPE) cells compared to RPE subclones (#21-2, 21-3, 21-7) harboring the indicated additional chromosomes (right). Each genotype or clone was measured in triplicate from independent culture wells, data compared by t test versus wild-type or parental cells (\* $P < 0.05$ , \*\* $P < 0.01$ ). (B) Cell cycle analysis in primary B cell progenitor colonies derived from wild-type or HMGN1-OE transgenic mice (n=3 biological replicates).

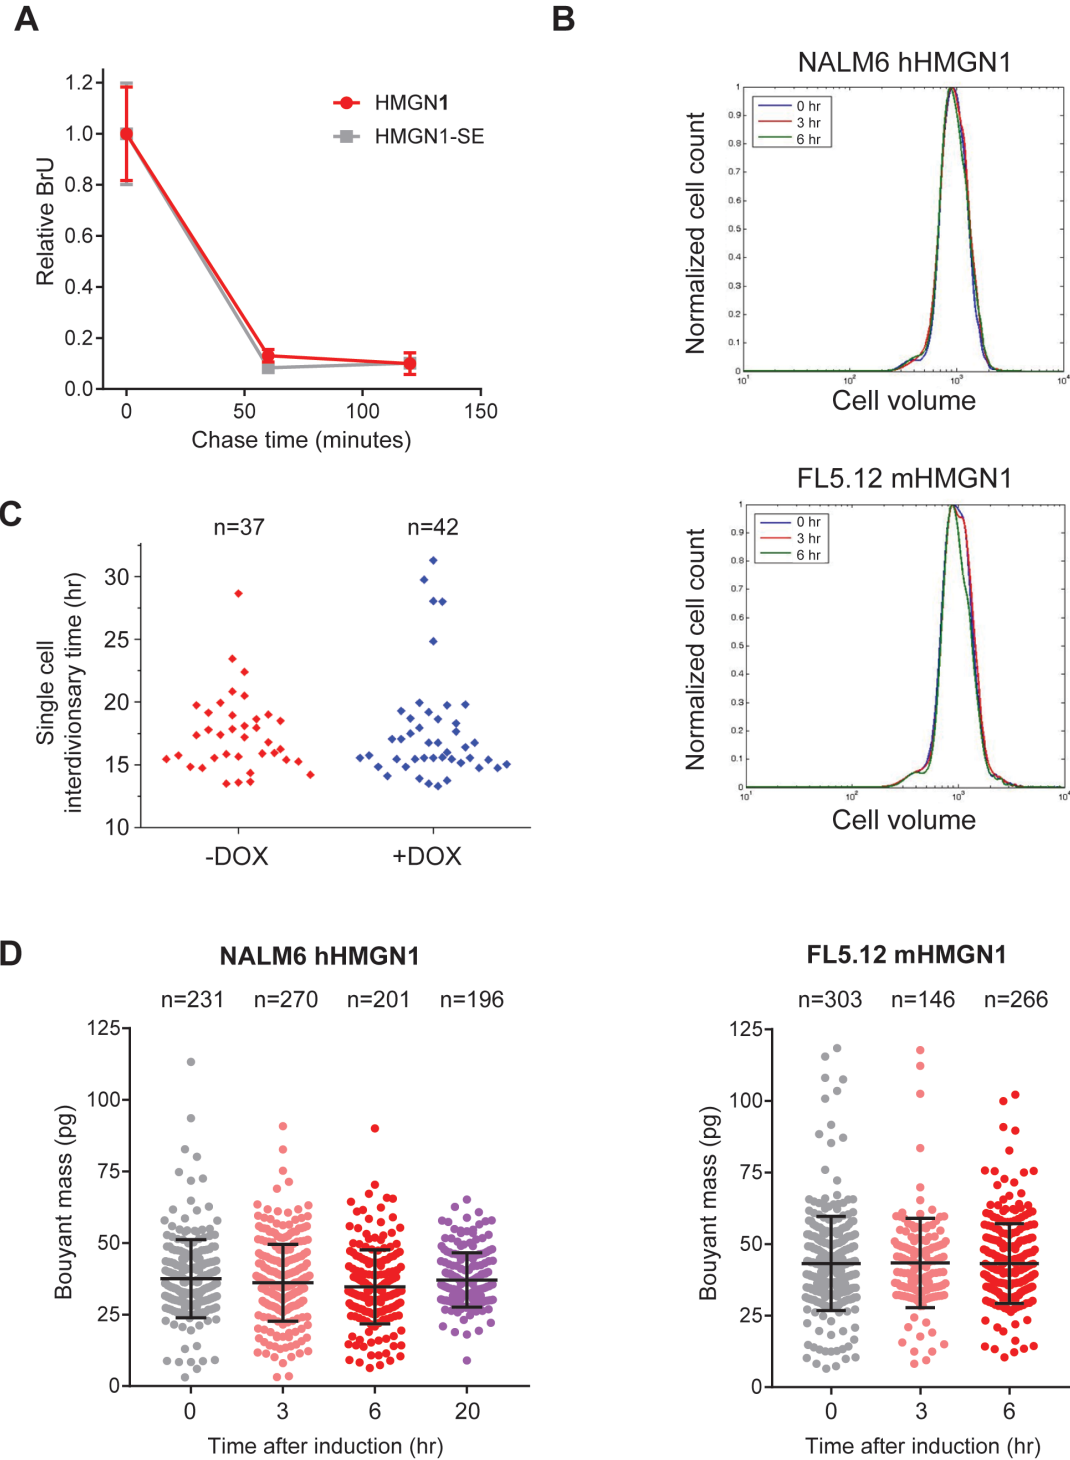

**Figure S2. Cells overexpressing HMGN1 have no difference in rate of RNA turnover, cell volume, single cell interdivisary time, or buoyant mass compared to cells overexpressing an HMGN1 mutant that is unable to bind nucleosomes. Related to Figure 3.**

(A) Pulse-chase analysis of RNA decay in Nalm6 cells 6 hours after induction of HMGN1 or HMGN1-SE expression. Doxycycline was added to the cells and 5 hours later BrU labeling was performed for one hour. Cells

were then washed and relative BrU was measured at the indicated time points. N=3 biological replicates. (B) Cell volume measured in Nalm6 human B-ALL cells (top) or FL5.12 mouse B cells (bottom) at baseline and at the indicated time points after induction of human or mouse HMGN1, respectively. Representative plots shown from 3 biological replicates. (C) Single cell interdivisionary time measured using a microfluidic trap assay in Nalm6 cells stably harboring a doxycycline-inducible HMGN1 over 24 hours in the absence or presence of doxycycline. (D) Buoyant mass measured using a SMR in single Nalm6 and FL5.12 cells at the indicated time points after induction of human or mouse HMGN1, respectively (n = number of single cells analyzed at the indicated time point).

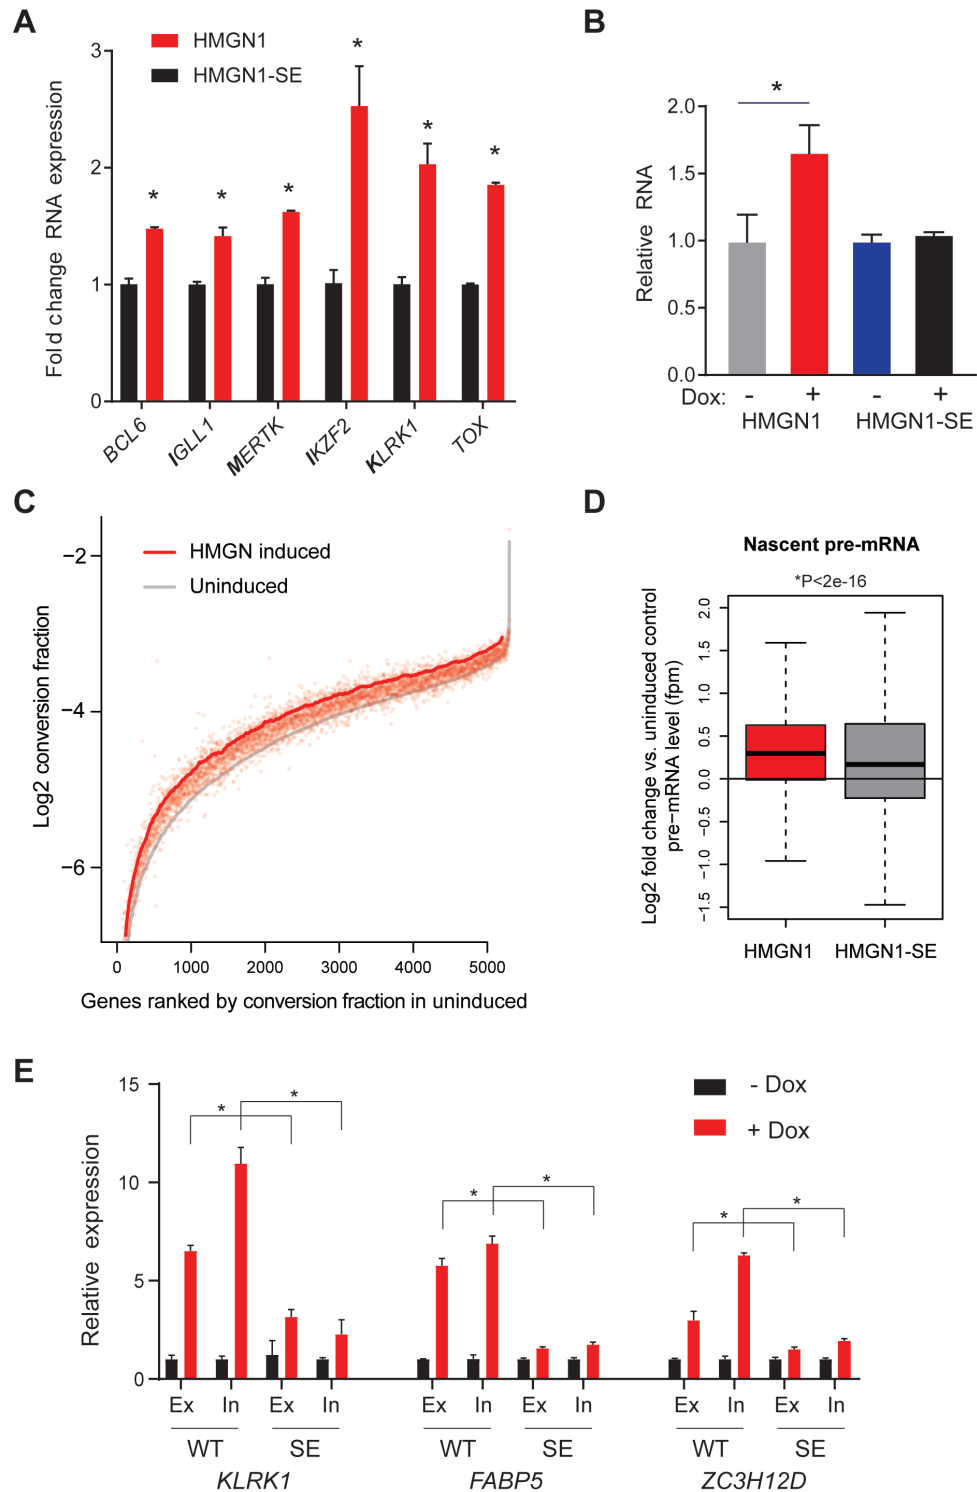

**Figure S3. HMGN1 overexpression affects global and gene-specific expression and nascent transcription. Related to Figure 3.**

(A) Real-time quantitative RT-PCR to confirm single gene expression differences detected in Nalm6 cells 6 hours after induction of HMGN1 or the HMGN1-SE mutant (n=technical triplicates, \*P<0.05). (B) Relative total RNA

quantitated by Hoechst/Pyronin Y flow cytometry in Nalm6 cells before and after induction of the indicated HMGN1 genes (n=biological triplicates, \*P<0.05). (C) SLAM-seq conversion fraction comparing Nalm6 cells labeled with 4-thiouridine, either at baseline or after addition of doxycycline to induce HMGN1. The x-axis represents genes ranked by conversion fraction (nascent reads transcribed during the labeling period over total reads) in uninduced cells, plotted versus the conversion fraction ( $\log_2$ ) in uninduced (smoothed gray line) or HMGN1-induced (smoothed red line; individual genes as red dots) on the y-axis. The upward shift of the red curve suggests that per gene nascent transcription is increased after induction of HMGN1. N=3 biological replicates for induced, n=2 biological replicates for uninduced. (D) SLAM-seq quantification of nascent pre-mRNA levels after induction of HMGN1 or the HMGN1-SE mutant compared to no induction. Distributions were compared by Welch's t test. (E) Real-time quantitative RT-PCR of exon (Ex) or intron (In) regions for the indicated genes after induction (+Dox) of HMGN1 (WT) or HMGN1-SE (SE) relative to uninduced (-Dox). Relative expression compared by t test (n=3 technical replicates, \*P<0.05). Controls also included qPCR reactions using cDNA prepared without reverse transcriptase ("no RT control"), which showed no amplification in any samples, suggesting there was no DNA contamination of the RNA preparation.

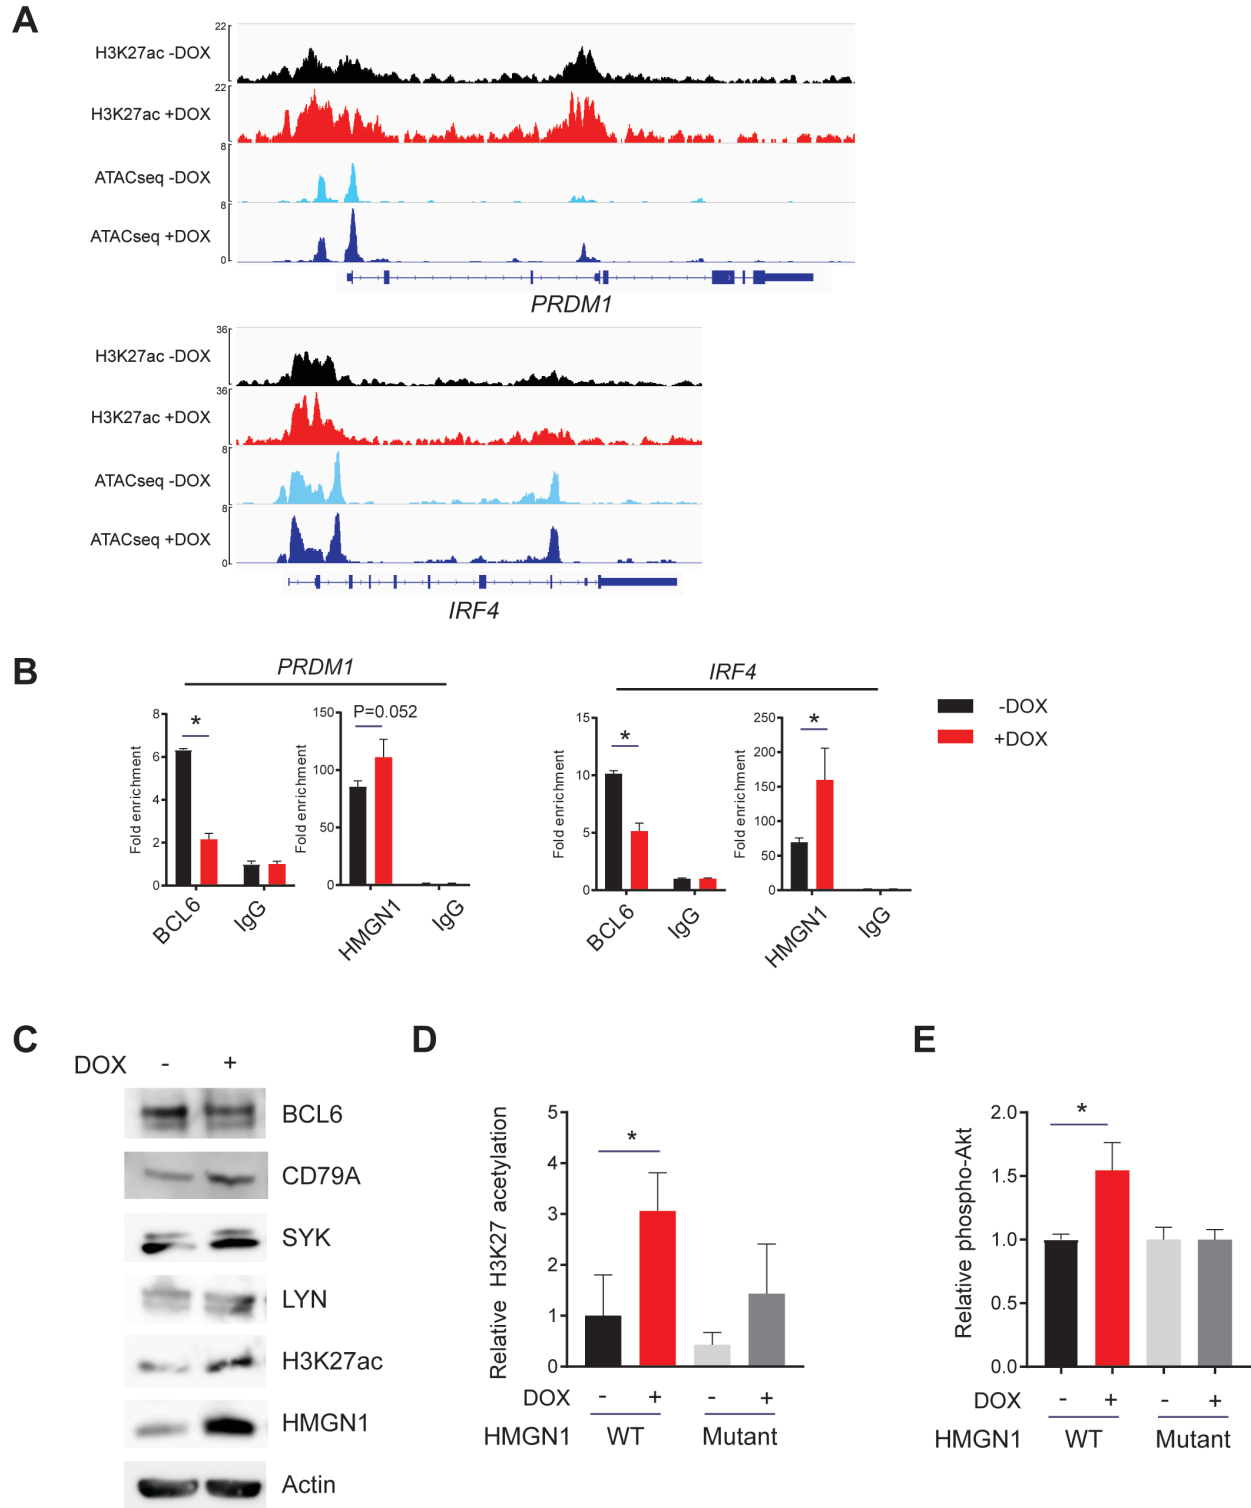

**Figure S4. Chromatin, transcriptional, and protein changes occur in Nalm6 preB-ALL cells after induction of HMGN1. Related to Figures 4 and 5.**

(A) Representative gene tracks in the *PRDM1* and *IRF4* loci before (-DOX) and after (+DOX) induction of HMGN1. Red and black tracks are S2 ChIP-Rx exogenous spike-in normalized H3K27acetyl ChIP-seq. Light and

dark blue tracks are ATAC-sequencing. (B) ChIP PCR in promoter regions of *PRDM1* and *IRF4* before and after induction of HMGN1 using antibodies targeting BCL6 or HMGN1, compared to control IgG antibodies (n=3 technical replicates, \*P < 0.05). (C) Western blot for the indicated proteins before and after induction of HMGN1. (D) Relative H3K27 acetylation quantitated by intracellular flow cytometry in Nalm6 cells before and after induction of the indicated HMGN1 genes (n=3 technical replicates, \*P<0.05). (E) Relative AKT phosphorylation quantitated by intracellular flow cytometry in Nalm6 cells before and after induction of the indicated HMGN1 genes (n=3 technical replicates, \*P<0.05).



| Primer                 | Sequence                  |
|------------------------|---------------------------|
| <b>Human qRT-PCR</b>   |                           |
| BCL6 For               | GGAGTCGAGACATCTTGACTGA    |
| BCL6 Rev               | ATGAGGACCGTTTTATGGGCT     |
| IGLL1 For              | ACCCAGCTCACCGTTTTAAGT     |
| IGLL1 Rev              | GGTCACCGTCAAGATTCCCG      |
| MERTK For              | CTCTGGCGTAGAGCTATCACT     |
| MERTK Rev              | AGGCTGGGTTGGTAAAAACA      |
| IKZF2 For              | TCACCCGAAAGGGAGCACT       |
| IKZF2 Rev              | CATGGCCCCTGATCTCATCTT     |
| TOX For                | TATGAGCATGACAGAGCCGAG     |
| TOX Rev                | GGAAGGAGGAGTAATTGGTGGA    |
| GAPDH For              | GGAGCGAGATCCCTCCAAAAT     |
| GAPDH Rev              | GGCTGTTGTCATACTTCTCATGG   |
| KLRK1 For              | GAGTGATTTTTCAACACGATGGC   |
| KLRK1 Rev              | ACAGTAACTTTCGGTCAAGGGAA   |
| KLRK1 intron For       | TTCTGGACTAATAGCAAAAATGTGA |
| KLRK1 intron Rev       | GACAACAGAGAAGTAGATTGCAACA |
| FABP5 For              | TGAAGGAGCTAGGAGTGGGAA     |
| FABP5 Rev              | TGCACCATCTGTAAAGTTGCAG    |
| FABP5 intron For       | GACCTTTGTCACAGGCCACT      |
| FABP5 intron Rev       | ACCGGGTTAACATTTGTGGA      |
| ZC3H12D For            | AGTTCTCTGCGACCCATAGTG     |
| ZC3H12D Rev            | AACAGCCAGCTTGATTCCCC      |
| ZC3H12D intron For     | CCTGGGCAACAGAGCTAGAC      |
| ZC3H12D intron Rev     | GGGGTGAAACACAGGAGAAA      |
| <b>Human CHIP-PCR</b>  |                           |
| PRDM1 CHIP For         | CAGTCCGAGGAAGGCTAACT      |
| PRDM1 CHIP Rev         | GGGTTCCATCGCTCTTGTACT     |
| IRF4 CHIP For          | CCATCGCAGTGGAAGTCTAG      |
| IRF4 CHIP Rev          | AGGGGAGAACAATCGTAACAAC    |
| Control intragenic For | GGCTCCTGTAACCAACCACTACC   |
| Control intragenic Rev | CCTCTGGGCTGGCTTCATTC      |
| <b>Mouse qRT-PCR</b>   |                           |
| Gapdh For              | AGGTCGGTGTGAACGGATTG      |
| Gapdh Rev              | TGTAGACCATGTAGTTGAGGTCA   |
| Hmgn1 For              | GGACGCGAACCGAAAAAGG       |
| Hmgn1 Rev              | CAGCCACGTGAGCCTGTTT       |
| Kit For                | GCCTGACGTGCATTGATCC       |

|           |                       |
|-----------|-----------------------|
| Kit Rev   | AGTGGCCTCGGCTTTTCC    |
| Fgf13 For | CTCATCCGGCAAAAGAGACAA |
| Fgf13 Rev | TTGGAGCCAAAGAGTTTGACC |

**Table S1. Oligonucleotide primer sequences. Related to Figure 3, 4, and 5, S3, and S4.**
